# Supplementary material
Source: Springer Nature journal article supplement (https://openaccess.sgul.ac.uk/id/eprint/113143/11/12874_2008_395_MOESM2_ESM.PDF)
Supplement: MOESM2 [file 12874_2008_395_MOESM2_ESM.PDF]

## Additional file 2: Main characteristics of included inception cohort studies

| Study                      | Cohort types, Speciality                                                                                                       | Study design<br>Follow-up                                                                      | Verification of publication status and results of unpublished studies                              | Publication rate                                                                                                                        | Definition of study results and other notes                                                                                                                                                                                                                                                     |
|----------------------------|--------------------------------------------------------------------------------------------------------------------------------|------------------------------------------------------------------------------------------------|----------------------------------------------------------------------------------------------------|-----------------------------------------------------------------------------------------------------------------------------------------|-------------------------------------------------------------------------------------------------------------------------------------------------------------------------------------------------------------------------------------------------------------------------------------------------|
| Bardy 1998[22]             | Clinical trials on medicinal products notified to the National Agency for Medicines in 1987, Finland.<br><br>Mixed speciality  | Clinical trials<br><br>Follow-up: 5-6 years                                                    | MEDLINE searched for publications.<br><br>Questionnaires sent to trial sponsors for trial results. | Positive 47% (52/111)<br>Inconclusive 33% (11/33)<br>Negative 11% (5/44)                                                                | Positive: the drug better (or equivalent to in equivalent trials) than comparators, or the objective of the study supported or confirmed.<br>Inclusive: exploratory studies or non-comparative or the risk-benefit was inconclusive.<br>Publication: published in journals included in Medline. |
| Cronin & Sheldon 2004 [23] | Studies sponsored by the NHS R&D programme (the North Thames Regional Office) from 07/1995 to 12/1998.<br><br>Mixed speciality | Mixed. Including quantitative (47%) and qualitative (53%) research.<br><br>Follow-up: >2 years | Questionnaires sent to investigators.<br><br>17% failed to respond.                                | Quantitative or qualitative effect (n=70) published in peer-reviewed journals:<br>Showed an effect 76% (26/34)<br>No effect 64% (23/36) | Methods used in Dickersin[26] were adopted to classify findings.                                                                                                                                                                                                                                |
| Decullier et al 2006[25]   | Protocols submitted for funding to the G. Lyon regional scientific committee in 1997.<br><br>Mixed speciality                  | Mixed:<br>Ob=51%<br>CT=25%<br><br>Follow-up: 8 years                                           | Questionnaires sent to investigators, up to 3 times.<br><br>20% failed to respond.                 | Completed studies:<br>Important results 70% (26/37)<br>Less important 60% (6/10)                                                        | Investigators rated the importance of results from 1 to 10. Important results were those >5.                                                                                                                                                                                                    |

|                            |                                                                                                              |                                                                                               |                                                                                                                               |                                                                                                                                                                                                                                                                        |                                                                                                                                                                                                                                                                                                                    |
|----------------------------|--------------------------------------------------------------------------------------------------------------|-----------------------------------------------------------------------------------------------|-------------------------------------------------------------------------------------------------------------------------------|------------------------------------------------------------------------------------------------------------------------------------------------------------------------------------------------------------------------------------------------------------------------|--------------------------------------------------------------------------------------------------------------------------------------------------------------------------------------------------------------------------------------------------------------------------------------------------------------------|
| Decullier et al 2005[24]   | Biomedical research protocol approved by French RECs in 1994.<br><br>Mixed: biomedical research              | Mixed:<br>Ob=13%<br>Exp(CT)=87%.<br><br>Follow-up: 5-7 years                                  | Questionnaires sent to investigators, or from REC databases.<br><br>31% failed to respond.                                    | Confirmatory results 69% (129/188)<br>Invalidating results 19% (3/16)<br>Inconclusive results 32% (14/44)                                                                                                                                                              | Confirmatory: results confirming study hypothesis.<br>Invalidating: results invalidating study hypothesis.<br>Inconclusive: not confirming or invalidating.                                                                                                                                                        |
| Dickersin & Min 1993[27]   | NIH 1979 funded clinical trials that were completed by 1988.<br><br>Mixed speciality                         | Clinical trials:<br>CT=100%.<br><br>Follow-up: 9 years                                        | Contacting and telephone interview of investigators.<br><br>26% failed to respond                                             | Sig/important 98% (121/124)<br>Non-significant 85% (63/74)                                                                                                                                                                                                             | Significant results: $p < 0.05$ or deemed to be of 'great importance'.<br>Non-significant results: all other results.                                                                                                                                                                                              |
| Dickersin et al 1992[26]   | Studies approved by IRBs at Johns Hopkins Health Institutions up to the end of 1980.<br><br>Mixed speciality | Mixed (Med / Pub):<br>Ob=37% / 85%<br>Exp=17% / 9%<br>CT=46% / 6%.<br><br>Follow-up: >7 years | Telephone interview of investigators.<br><br>30% failed to provide adequate data                                              | Medicine & hospital<br>Sig/important 89% (184/208)<br>Non-significant 69% (93/134)<br><br>Public health<br>Sig/important 71% (75/106)<br>Non-significant 58% (38/66)<br><br>Clinical trials (both centres)<br>Sig/important 87% (84/96)<br>Non-significant 72% (52/72) | Significant results: $p < 0.05$ or results considered to be of great importance.<br>Non-significant results: all other results.<br>Risk of publication bias may be under-estimated by excluding studies due to lack of information.<br>Unpublished data for clinical trials obtained from Hopewell et al 2009.[17] |
| Easterbrook et al 1991[28] | Studies approved by the Central Oxford REC between 1984-87.<br><br>Mixed speciality                          | Mixed:<br>Ob=30%<br>Exp=18%<br>CT=52%.<br><br>Follow-up: 3-6 years                            | Questionnaires sent to investigators, followed by a telephone interview.<br><br>8% failed to respond or provide adequate data | Fully published<br>Significant 60% (93/154)<br>Non-significant trend 35% (12/34)<br>No difference 34% (33/97)<br><br>Published or presented<br>Significant 85% (131/154)<br>Non-significant trend 65% (22/34)<br>No difference 56% (54/97)                             | Significant results: $p < 0.05$ .<br>Non-significant trend: difference with a $p$ value of $\geq 0.05$ .<br>Null: no difference.<br><br>Examined factors associated with publication (but not necessarily publication bias)                                                                                        |

|                          |                                                                                                                        |                                                                                      |                                                                                                                                                    |                                                                                                                                                                                                                                                                                                                                                                                                                                                                                                                 |                                                                                                                                                                                                                                                                                                                                      |
|--------------------------|------------------------------------------------------------------------------------------------------------------------|--------------------------------------------------------------------------------------|----------------------------------------------------------------------------------------------------------------------------------------------------|-----------------------------------------------------------------------------------------------------------------------------------------------------------------------------------------------------------------------------------------------------------------------------------------------------------------------------------------------------------------------------------------------------------------------------------------------------------------------------------------------------------------|--------------------------------------------------------------------------------------------------------------------------------------------------------------------------------------------------------------------------------------------------------------------------------------------------------------------------------------|
| Ioannidis 1998[29]       | RCTs conducted by 2 trialist groups (sponsored by the NIH) from 1986-1996.<br><br>AIDS/HIV                             | Clinical trial: CT=100%.<br><br>Follow-up: 1-10 years                                | Information obtained from a database of HIV trials sponsored by NIH. Supplemental data from investigators and staff responsible for the protocols. | Positive results: 74% (20/27)<br>Non-positive: 41% (16/39)                                                                                                                                                                                                                                                                                                                                                                                                                                                      | Positive: statistically significant ( $p<0.05$ ) in favour of an experimental arm.<br>Non-positive: significantly in favour of the control arm or non-significant. The focus of the study was time lag bias. Data obtained from Hopewell et al.[81]                                                                                  |
| Misakian & Bero 1998[30] | Research on passive smoking funded by 76 organisations between 1981 and 1995.<br><br>Health effects of passive smoking | Mixed: Exp=23%<br>Obs=77%<br><br>Follow-up: median 5 years                           | Semistructured telephone interview of investigators.<br><br>17% failed to respond                                                                  | Significant: 85% (28/33)<br>Non-significant: 86% (18/21)<br>Mixed: 14% (1/7)                                                                                                                                                                                                                                                                                                                                                                                                                                    | Statistically significant: $p\leq 0.05$ .<br>Mixed results: multiple primary outcomes at least one was statistically significant.<br><br>Cox regression analysis was used to estimate hazard ratio.                                                                                                                                  |
| Stern & Simes 1997[31]   | Studies submitted to Royal Prince Alfred Hospital REC between 1979-1988.<br><br>Mixed speciality                       | Mixed: Ob=22%<br>Exp=22%<br>CT=56% (details available).<br><br>Follow-up: 3-12 years | Questionnaires sent to investigators.<br><br>30% failed to respond.                                                                                | Quantitative studies<br>Significant results 68% (99/146)<br>Non-significant trend 20% (4/20)<br>No difference 44% (23/52)<br><br>Qualitative studies<br>Striking 70% (19/27)<br>Important/definite 59% (35/59)<br>Negative/unimportant 53% (9/17)<br><br>Clinical trials (n=167)<br>Quantitative trials<br>Significant 72% (55/76)<br>Non-significant trend 20% (3/15)<br>Null 38% (15/39)<br><br>Qualitative trials<br>Striking 50% (3/6)<br>Important/definite 61% (11/18)<br>Negative/unimportant 69% (9/13) | Quantitative studies<br>Significant: $p<0.05$ .<br>Non-significant trend: $0.05\leq p<0.10$ .<br>No difference: $p\geq 0.10$ .<br><br>Classification of qualitative studies based on principle investigators' judgement.<br><br>With data on time delayed publication. Qualitative studies similarly vulnerable to publication bias. |

|                             |                                                                                                           |                                   |                                                                              |                                                                 |                                                                                                                                |
|-----------------------------|-----------------------------------------------------------------------------------------------------------|-----------------------------------|------------------------------------------------------------------------------|-----------------------------------------------------------------|--------------------------------------------------------------------------------------------------------------------------------|
| Wormald et al 1997[32]      | Randomised trials processed through the Pharmacy of Moorfields Eye Hospital since 1963.<br><br>Eye health | RCTs<br><br>Follow-up: >2 years   | Retrospective review                                                         | Significant 93% (14/15)<br>Non-significant 71% (15/21)          | Significant $p < 0.05$ ; and<br>Non-significant $p \geq 0.05$ .<br><br>Published as a brief abstract, data from Dwan et al[18] |
| Zimpel & Windeler 2000 [33] | 140 medical theses on complementary medical subjects.<br><br>Complementary medicine                       | Mixed.<br><br>Follow-up: >5 years | Literature search and contacting investigators.<br><br>Response rate unclear | Positive results: 40% (43/107)<br>Negative results: 28% (15/53) | Full publication in German, information obtained mainly from the abstract.                                                     |

**Notes:** REC - Research Ethics Committee. IRB - Institution Research Board. NIH - National Institute of Health. CT – clinical trial. RCT – randomised controlled trial. Ob – observational study. Exp – experimental study.
